## **Determinants of wasting, stunting, and undernutrition among children under five years: Cross-sectional study in southern Punjab, Pakistan**

*Javeria Saleem, Rubeena Zakar, Rana Muhammad Aadil, Muhammad Salman Butt, Faisal Mushtaq, Gul Mehar Javaid Bukhari, Florian Fischer*

***Javeria Saleem***

Department of Public Health, University of the Punjab, Lahore, Pakistan

[javeria.hasan@hotmail.com](mailto:javeria.hasan@hotmail.com)

***Rubeena Zakar***

Department of Public Health, University of the Punjab, Lahore, Pakistan

[rubeena499@gmail.com](mailto:rubeena499@gmail.com)

***Rana Muhammad Aadil***

National Institute of Food Sciences and Technology, University of Agriculture, Faisalabad, Pakistan

[dilrana89@gmail.com](mailto:dilrana89@gmail.com)

***Muhammad Salman Butt***

Department of Public Health, University of the Punjab, Lahore, Pakistan

[sames\\_butt@hotmail.com](mailto:sames_butt@hotmail.com)

***Faisal Mushtaq***

Institute of Public Health, Lahore, Pakistan

[faisalskml@gmail.com](mailto:faisalskml@gmail.com)

***Gul Mehar Javaid Bukhari***

Department of Community Medicine, Federal Medical College, Islamabad, Pakistan

[drgulmehar@gmail.com](mailto:drgulmehar@gmail.com)

***Florian Fischer*** [Corresponding author]

Institute of Public Health, Charité – Universitätsmedizin Berlin, Berlin, Germany

[florian.fischer1@charite.de](mailto:florian.fischer1@charite.de)

1 **Abstract**

2 **Background:** Malnutrition is a serious concern globally and may lead to early death if it remains  
3 untreated. Prevalence of malnutrition is high in South Asian countries. Therefore, this study aims  
4 to evaluate the determinants of wasting, stunting, and undernutrition in under-five children of  
5 southern Punjab, Pakistan.

6 **Methods:** We conducted a cross-sectional study among 185 children. Anthropometric measures  
7 were done by nutritional experts and pediatricians. Data were analyzed with SPSS version 25.0. A  
8 p-value <0.05 was considered statistically significant.

9 **Results:** Significant determinants of wasting (weight-for-height) were family monthly earnings  
10 ( $\beta=-0.14$ ; 95% CI: -0.89 to -0.04;  $p=0.03$ ) and complementary feeding practices ( $\beta=-0.21$ ; 95%  
11 CI: -1.14 to 0.19;  $p<0.001$ ). For stunting (length/height-for-age), the significant determinants were  
12 tuberculosis (TB) contact history ( $\beta=-0.15$ ; 95% CI: -0.97 to -0.03;  $p=0.03$ ) and non-use of  
13 exclusive breastfeeding practices ( $\beta=-0.19$ ; 95% CI: -1.40 to 0.16;  $p=0.01$ ). For undernutrition,  
14 significant determinants were monthly income ( $\beta=0.28$ ; 95% CI: 0.11 to 0.62;  $p=0.02$ ) and  
15 exclusive breastfeeding practices ( $\beta=0.22$ ; 95% CI: 0.17 to 0.39;  $p=0.02$ ).

16 **Conclusion:** Social determinants such as family earnings, family food security, practices of  
17 exclusive breastfeeding and proper complementary feeding, number of under-five siblings, and  
18 history of TB contact have a strong association with malnutrition and undernutrition. Concerted  
19 and comprehensive strategies are needed for the improvement of associated factors to combat  
20 malnutrition as well as undernutrition among children.

21

22 **Keywords:** association, malnutrition, undernutrition, stunting, wasting

## 23 **Introduction**

24 Malnutrition with all its types, especially undernutrition, wasting (height-for-weight), and stunting  
25 (height-for-age) are usually characterized by abnormal or inadequate food intake (1). Owing to  
26 undernutrition, children are more susceptible to diseases or even death. The risk of death increases  
27 in moderate to severely wasted children. According to the World Health Organization (WHO),  
28 stunting is also present among children with low socioeconomic status, poor feeding practices,  
29 poor nutrition and health of the mother, and child illness in the early stages of life [1].

30 Globally, the situation of malnutrition is critical: In 2019, 47.0 million children under the age of  
31 five years were wasted and 144.0 million children were stunted. South Asia has the highest number  
32 of wasted (25.2 million; 14.3% of children under five in South Asia) and stunted (55.9 million;  
33 31.7% of children under five in South Asia) children under five [2]. Overall, families with higher  
34 income and education levels had lower rates of underweight children [3].

35 The death rate associated with undernutrition is higher in low- to middle-income countries. Almost  
36 45% of deaths of children below the age of five years were associated with undernutrition [1].  
37 Wasted children are more prone to experience several infections, delays in cognitive development,  
38 and reduced productivity in adulthood [4]. The economic, medical, social as well as developmental  
39 impacts of malnutrition cause decreased growth and development potential of children. It is a very  
40 serious issue not only for individuals and families, but also for economic productivity of already  
41 resource scarce countries [1].

42 According to the National Nutrition Survey 2018, Pakistan has a 40.2% stunting prevalence, 17.7%  
43 wasting rate, and 28.9% of children below the age of five years are underweight. Overall, 48.4%  
44 of infants received exclusive breastfeeding and 45.8% of mothers started early initiation of  
45 breastfeeding. Boys are slightly more stunted, wasted, and underweight (40.9%, 18.4%, and

46 29.3%, respectively) as compared to girls (39.4%, 17.0%, and 28.4%, respectively) [5]. Although  
47 a growing body of research on child nutritional status is available in Pakistan, studies are still  
48 lacking which investigate the effect of different determinants of malnutrition. Therefore, the  
49 purpose of the current study was to understand the determinants of wasting, stunting, and  
50 undernutrition to identify new targets for intervention to prevent malnutrition of children under  
51 five years of age in southern Punjab, Pakistan.

52

## 53 **Methods**

### 54 *Study design*

55 A multicenter cross-sectional study was conducted at Community Management of Acute  
56 Malnutrition (CMAM) centers in four villages of southern Punjab, running under the supervision  
57 of the health department of the government of Pakistan. These were government-designated  
58 centers for the management of malnutrition in under five children. Study participants enrolled from  
59 these centers visit CMAM centers to receive their nutritional treatment. Southern Punjab is a highly  
60 populated and socio-economically deprived area with the worst indicators of illiteracy,  
61 malnutrition, infant and under-five child mortality in Pakistan [5,6].

62

### 63 *Sample*

64 The sample size was calculated by using the cross-sectional study formula taking severe  
65 malnutrition prevalence (p) as 11% and error term (d) as 0.05. The calculated sample size was  
66 n=151. This number was further enhanced to 185 for study precision, strength and accuracy.

67 A total of 185 children aged 6–59 months without gender specification were enrolled. Eligibility  
68 criteria were having severe wasting or stunting identified by anthropometric indices of WHO

69 classification, which are having height-for-weight (wasting)  $< -3$  standard deviations (SD) and  
70 height-for-age (stunting)  $< -2$  SD [7,8]. All children were from the same ethnic and language  
71 background. Written consent was obtained from parents after introducing them to the purpose of  
72 the study. A flow chart for eligibility criteria is presented in Figure 1.

73

#### 74 ***Baseline assessments***

75 Interviews with parents were conducted at CMAM centers. An extensively pretested structured  
76 questionnaire was used for collection of information from parents/caregivers regarding family  
77 sociodemographic characteristics (income, parental education, profession, household size, and  
78 family structure), child nutrition (breastfeeding and complementary feeding practices), biological  
79 and healthcare characteristics (child medical history, immunization record, and access to health  
80 care). Family monthly earning was assessed by income from all sources in Pakistani rupees (PKR).  
81 Exclusive breastfeeding and complementary feeding practices (quantity, variety, and frequency)  
82 of semisolid diet were judged according to WHO recommendations [9]. For immunization status,  
83 the Expanded Program of Immunization (EPI) schedule was followed [10]. The immunization  
84 status was verified by the vaccination card. Child medical history was assessed by previous  
85 hospital records and prescriptions. A brief history was acquired from parents/caregivers to identify  
86 the child for any seizure disorder and neurological deficit. Children sick with these conditions were  
87 not enrolled in the study. All of these determinants of wasting, stunting, and underweight were  
88 included in the study after an extensive literature search.

89 In case of hospital delivery, child gestational age was calculated from previous antenatal hospital  
90 documentation and in case of delivery at home, information based on a maternal report was noted.  
91 For children who were delivered before 37 weeks of gestation and at the date of data collection

92 were  $\leq 24$  months of age, their age was adjusted by deducting the entire weeks of missed gestation  
93 from the current age.

94

### 95 *Anthropometric assessments*

96 Anthropometric assessments were taken by the qualified nutritional supervisors. Their competency  
97 in assessing weight and height was approved by the first author. Double anthropometric values  
98 were recorded by a study team. If both values were different from each other, then further  
99 measurements were conducted until an exact value was measured. The replicated value was then  
100 documented. Children's weight (approximated to 10 g) was assessed without clothing or in very  
101 light outfit through a UNISCALE, which was fixed by a standard weight and adjusted to zero  
102 before each evaluation. First, UNISCALE was used to record only the weight of the mother if  
103 infants and children were not able to stand. Afterwards, the undressed baby or child was given to  
104 the mother as she stood on the scale, and the cumulative weight of the mother and infant was  
105 evaluated [8,11]. Infant/child weights were calculated as the difference between these two  
106 measures.

107 The recumbent length of kids  $\leq 87$  cm in height was measured to the nearest 0.1 cm with a length-  
108 measuring board with a fixed headrest and an adjustable foot piece ("SECA GmbH & Co. KG,  
109 Hamburg, Germany"). Children over 87 cm tall were evaluated by standing with their bare feet  
110 and heels together on a flat horizontal plate attached to the measurement board. Weight-for-height  
111 Z-scores and height-for-age Z-scores were calculated using the WHO Child Growth Standards  
112 [8,11]. Nutrition status classification was done with "WHO ANTHRO, version 3.2.2".

113

114 ***Dependent and independent variables***

115 In this study analysis, the dependent variables were wasting (weight-for-height Z-score) as a  
116 measure of acute malnutrition, stunting (height-for-age Z-score) as a measure of chronic  
117 malnutrition, and undernutrition (weight-for-age Z-score). All sociodemographic, medical, and  
118 dietary factors described above have been included as independent variables.

119

120 ***Data analysis***

121 Data was analyzed using SPSS 25.0. An independent t-test was used to compare the Z-score mean  
122 differences between independent variables for wasting, stunting, and undernutrition. A  
123 multivariate analysis was performed to identify the significant determinants causing wasting,  
124 stunting, and undernutrition among children under five years. Based on continuous dependent  
125 variables, Linear regression models were applied for multivariate analyses. The results were  
126 reported as  $\beta$  coefficients with 95% confidence intervals (CI). p-values of 0.05 and less were  
127 considered as statistically significant.

128

129 ***Ethical approval***

130 Permission to conduct the study was obtained from the provincial and district health department  
131 of Punjab, Pakistan. This study was conducted according to the guidelines laid down in the  
132 Declaration of Helsinki and all procedures involving human subjects were approved by the  
133 Ethical Review and Advanced Study Research Board of the University of Punjab, Pakistan (ref-  
134 9/2352-ACAD). Written informed consent from parents was obtained from all subjects.

135

136 **Results**

137 A total of 185 children aged 15.36 months (SD±10.23) participated in this study. They had a mid-  
138 upper arm circumference of 10.19 cm (SD±0.96). The majority were females (n=104; 56.2%), had  
139 a family income of ≤15000 PKR (n=128; 69.2%) and at least two siblings (n=144; 77.8%). Overall  
140 100 children (54.1%) had one to seven previous episodes of illness, 149 (80.5%) had no exclusive  
141 breastfeeding, and poor complementary feeding practices were seen in 165 children (89.2%)  
142 children as shown in Table 1.

143

144 ***Determinants of wasting (acute malnutrition: weight-for-height Z-score)***

145 In the bivariate analysis, wasting was significantly associated with family monthly earning with a  
146 mean difference of 0.43 (95% CI: 0.01 to 0.85; p=0.04) and complementary feeding practices with  
147 a mean difference of 0.51 (95% CI: 0.05 to 0.96; p=0.03). Applying linear regression for the  
148 multivariate analysis, family monthly income ( $\beta$ =-0.14; 95% CI: -0.89 to -0.04; p=0.03) and  
149 complementary feeding practices ( $\beta$ =-0.21; 95% CI: -1.14 to 0.19; p<0.001) were again significant  
150 determinants (Table 2).

151

152 ***Determinants of stunting (chronic malnutrition: height-for-age Z-score)***

153 In bivariate analysis of stunting, tuberculosis (TB) contact history and the practices of exclusive  
154 breastfeeding with a mean difference of 0.41 (95% CI: -0.53 to 0.86; p=0.04) and 0.75 (95% CI:  
155 0.18 to 1.31; p=0.01), respectively, were statistically significant. The linear regression showed a  
156 significant association of stunting with TB contact history ( $\beta$ =-0.15; 95% CI: -0.97 to 0.03; p=0.03)  
157 and exclusive breastfeeding practices ( $\beta$ =-0.19; 95% CI: -1.40 to 0.16; p=0.01) (Table 3).

158



159 ***Determinants of undernutrition (weight-for-age Z-score)***

160 The results for undernutrition are shown in Table 4. In the bivariate analysis, monthly income with  
161 a mean difference of 0.32 (95% CI: 0.03 to 0.61; p=0.03) and the practices of exclusive  
162 breastfeeding with a mean difference of 0.39 (95% CI: 0.05 to 0.73; p=0.03) were significantly  
163 associated with undernutrition. Application of linear regression in the multivariate analysis showed  
164 a statistically significant association between undernutrition and monthly income ( $\beta=0.28$ ; 95%  
165 CI: 0.11 to 0.62; p=0.02) and exclusive breastfeeding practices ( $\beta=0.22$ ; 95% CI: 0.17 to 0.39;  
166 p=0.02).

167

168 **Discussion**

169 Malnutrition and undernutrition are detrimental for the future generation. Our study highlighted  
170 several determinants of wasting, stunting, and undernutrition. If addressed carefully, it could result  
171 in lower rates of children suffering from these conditions. Among others, the results show that  
172 children from low socio-economic status (monthly income less than 15,000 PKR) had a higher  
173 risk of wasting as compared to those children who belonged to relatively higher income (15,000  
174 to 35,000 PKR monthly). Income level is an obvious factor that affects food intake. Families with  
175 low income are not able to feed their children properly due to limited resources. Some other studies  
176 also claim the effect of income on malnutrition [12,13].

177 In our study, the majority of the children were severely acute malnourished. In addition, chronic  
178 malnourishment owed to poor complementary feeding practices. Because weaning practices have  
179 a crucial role in the development of children and prevention of malnutrition, proper eating habits  
180 or good complementary feeding practices are key factors to improve the nutritional status of  
181 children. When children receive an adequate amount of food or a complementary diet, they have

182 a positive trend towards healthy growth and development. Poor weaning practices negatively affect  
183 the nutritional status leading to malnutrition [2,9]. Complementary feeding along with  
184 breastfeeding up to 24 months of age provides an adequate amount of nutrients and also provides  
185 balanced nutrition that is essential not only for the development of children but also for the  
186 prevention of malnutrition [9].

187 Breastfeeding should start from birth and continue till the second birthday of the child along with  
188 complementary feeding that prevents acute and chronic malnutrition, as mother's milk alone  
189 cannot fulfill the requirement of growing children [9,14,15]. Breastfeeding without  
190 complementary feeding after six months of age might be a risk factor for malnutrition due to the  
191 lack of essential nutrients that are necessary for the normal growth and development of children  
192 [9].

193 Improper and non-exclusive breastfeeding can lead to acute and chronic malnutrition. According  
194 to a study conducted in Pakistan, 48.4% of children were exclusively breastfed and 45.8% of  
195 mothers started early initiation of breastfeeding right after the birth of a baby [5]. Exclusive  
196 breastfeeding should start in the first hour after the birth, because mother's milk has a balanced  
197 amount of nutrients necessary for the newborn [9,12]. Some infectious diseases have an impact on  
198 the degree of malnutrition as well as on the growth and development of children. Previous research  
199 has shown that children frequently having infections were more undernourished [16-18]. Children  
200 having a history of TB were more likely to be stunted and malnourished because of inflammation  
201 [16].

202 Children with three or more siblings are more likely to be stunted than those children who have  
203 one or two siblings. The point is that with more children in a household, lower amounts of food  
204 might be available per person. In this way, health and nutritional status may be compromised and

205 children are more likely to be wasted or stunted [2,14,15]. Children born at birth intervals less than  
206 two years are more likely to develop acute or chronic malnutrition [11,14]. The higher the number  
207 of children under five in a family, the more scarce are the resources to properly feed all children  
208 [2,17,18]. A large household size also has been shown to negatively affect children's health,  
209 nutritional status, and development [12,17].

210 Mother's education has an important part in the healthy growth and development of infants and  
211 young children. In the current, the study majority of mothers were uneducated and their children  
212 showed more nutritional problems. An educated mother may be better aware of the nutritional  
213 needs of her child and, thereby, may prevent stunting and wasting [19].

214 There are some limitations to this study due to its cross-sectional design. Anthropometric measures  
215 have been conducted by qualified personell which promote data quality. By observing children's  
216 nutritional state with greater insight, the dynamic nature of child's growth and development could  
217 be better understood.

218

## 219 **Conclusion**

220 Children under the age of five years are prone to malnutrition as well as undernutrition. Almost all  
221 developing countries are suffering from the public health issues of malnutrition as well as  
222 undernutrition among children. The findings of the current study indicate that wasting and stunting  
223 along with undernutrition are associated with exclusive breastfeeding and complementary feeding  
224 practices, household size, family earning, and history of infections. Concerted efforts will be  
225 needed from all sectors of society to tackle the problem of child malnutrition in Pakistan. Alertness  
226 regarding a child's dietary needs and other factors leading to child growth must be incorporated in  
227 the child nutrition program.

228 **List of abbreviations**

|     |      |                                            |
|-----|------|--------------------------------------------|
| 229 | CI   | Confidence interval                        |
| 230 | CMAM | Community Management of Acute Malnutrition |
| 231 | EPI  | Expanded Program of Immunization           |
| 232 | PKR  | Pakistani rupee                            |
| 233 | SD   | Standard deviation                         |
| 234 | TB   | Tuberculosis                               |
| 235 | WHO  | World Health Organization                  |

236

237

238 **DECLARATIONS**

239 **Ethical approval and consent to participate**

240 The study was conducted after the approval of the Ethical Review and Advanced Study Research  
241 Board of the University of Punjab, Pakistan (ref-9/2352-ACAD). . Written consent was obtained  
242 from parents after introducing them to the purpose of the study.

243

244 **Consent for publication**

245 Not applicable

246

247 **Availability of data and materials**

248 Data is available from corresponding author upon reasonable request.

249

250 **Competing interests**

251 The authors declare no conflict of interest. RZ and FF serve on the Editorial Board of PLoS One.

252

253 **Funding**

254 This research received no supporting funds from any funding agency in the public, commercial, or  
255 not-for-profit sector.

256

257 **Author contributions:**

258 Conceptualization: J.S. and R.Z.; Data curation: J.S.; Formal analysis: J.S.; Writing – original  
259 draft: J.S.; Writing – reviewing & editing: R.Z., R.M.A., M.S.B., F.M., G.M.J.B. and F.F.;  
260 supervision: G.M.J.B. and F.F. All authors read and approved the final version of the manuscript.

261

262 **Acknowledgments**

263 Not applicable.

264

265 **References**

- 266 1. World Health Organization. Malnutrition Fact Sheet. Available online:  
267 <https://www.who.int/news-room/fact-sheets/detail/malnutrition>; 2021 [accessed 22  
268 October 2021].
- 269 2. UNICEF, WHO, World Bank Group. Levels and trends in child malnutrition. UNICEF /  
270 WHO / World Bank Group Joint Child Malnutrition Estimates. Key findings of the 2020  
271 edition. Geneva: World Health Organization; 2020.

- 272 3. Hossain FB, Shawon MS, Al-Abid MS, Mahmood S, Adhikary G, Bulbul MM. Double  
273 burden of malnutrition in children aged 24 to 59 months by socioeconomic status in five  
274 South Asian countries: evidence from demographic and health surveys. *BMJ Open*.  
275 2020;10(3):e032866.
- 276 4. Waber DP, Bryce CP, Girard JM, Zichlin M, Fitzmaurice GM, Galler JR. Impaired IQ and  
277 academic skills in adults who experienced moderate to severe infantile malnutrition: a 40-  
278 year study. *Nutritional Neuroscience*. 2014;17(2):58-64.
- 279 5. UNICEF. National Nutrition Survey 2018 – Key Findings Report. Available online:  
280 [https://www.unicef.org/pakistan/reports/national-nutrition-survey-2018-key-findings-](https://www.unicef.org/pakistan/reports/national-nutrition-survey-2018-key-findings-report)  
281 [report](https://www.unicef.org/pakistan/reports/national-nutrition-survey-2018-key-findings-report); 2019 [accessed 22 October 2021].
- 282 6. Demographic and Health Surveys. Calverton: MEASURE DHS. Pakistan; 2013.
- 283 7. World Health Organization. Guideline: updates on the management of severe acute  
284 malnutrition in infants and children. Geneva: World Health Organisation; 2013.
- 285 8. World Health Organization. WHO child growth standards and the identification of severe  
286 acute malnutrition in infants and children: a joint statement by the World Health  
287 Organization and the United Nations Children’s Fund. Geneva: World Health  
288 Organization; 2009.
- 289 9. World Health Organization. Infant and Young Child Feeding. Available online:  
290 <https://www.who.int/news-room/fact-sheets/detail/infant-and-young-child-feeding>; 2021  
291 [accessed 22 October 2021].
- 292 10. Waheed M. WHO EMRO | Expanded Programme on Immunization | Programmes |  
293 Pakistan. Geneva: World Health Organization; 2020.

- 294 11. Selina L, Pamela D, Richard H, Lancet Early Childhood Development Series Steering  
295 Committee. A good start will ensure a sustainable future for all. *Lancet*. 2017;389:8-9.
- 296 12. Nambuusi BB, Ssempiira J, Makumbi FE, Kasasa S, Vounatsou P. The effects and  
297 contribution of childhood diseases on the geographical distribution of all-cause under-five  
298 mortality in Uganda. *Parasite Epidemiology and Control*. 2019;5:e00089.
- 299 13. Nott J. Malnutrition in a modernizing economy: The changing aetiology and epidemiology  
300 of malnutrition in an African Kingdom, Buganda c. 1940–73. *Medical History*.  
301 2016;60(2):229-249.
- 302 14. Kahssay M, Woldu E, Gebre A, Reddy S. Determinants of stunting among children aged  
303 6 to 59 months in pastoral community, Afar region, North East Ethiopia: unmatched case  
304 control study. *BMC Nutrition*. 2020;6:9.
- 305 15. Eunice MJ, Cheah WL, Lee PY. Factors Influencing Malnutrition among Young Children  
306 in a Rural Community of Sarawak. *Malaysian Journal of Nutrition*. 2014;20(2):145-164.
- 307 16. Wagstaff A, Bustreo F, Bryce J, Claeson M. Child health: reaching the poor. *American*  
308 *Journal of Public Health*. 2004;94(5):726-736.
- 309 17. Chattopadhyay N, Saumitra M. Developmental Outcome in Children with Malnutrition.  
310 *Journal of Nepal Paediatric Society*. 2016;36(2):170-177.
- 311 18. Gupta N, Kabra M. Approach to the diagnosis of developmental delay - the changing  
312 scenario. *Indian Journal Medical Research*. 2014;139:4-6.
- 313 19. Mason F, Rawe K, Wright S. Superfood for babies: how overcoming barriers to  
314 breastfeeding will save children's lives. London: Save the Children; 2013.

315

316 **Figure 1: Flowchart of participant recruitment**

317

318 **Tables**

319

320 **Table 1: Characteristics of study participants**

| <b>Variable</b>                | <b>Category</b>   | <b>n (%)</b> |
|--------------------------------|-------------------|--------------|
| Age<br>(15.36 ± 10.23)         | ≤ 12 months       | 112 (60.5)   |
|                                | 13-24 Months      | 45 (24.3)    |
|                                | ≥ 25 Months       | 28 (15.1)    |
| Gender                         | Male              | 81 (43.8)    |
|                                | Female            | 104 (56.2)   |
| Income per month               | ≤ 15,000 PKR      | 128 (69.2)   |
|                                | 15,000-35,000 PKR | 57 (30.8)    |
| Under-five siblings            | ≤ 2               | 144 (77.8)   |
|                                | ≥ 3               | 41 (22.2)    |
| Immunization                   | Incomplete        | 46 (24.9)    |
|                                | Complete          | 139 (75.1)   |
| History of parasite            | Yes               | 42 (22.7)    |
|                                | No                | 143 (77.3)   |
| History of TB                  | Yes               | 81 (43.8)    |
|                                | No                | 104 (56.2)   |
| History of measles             | Yes               | 28 (15.1)    |
|                                | No                | 157 (84.9)   |
| Episodes of Illness            | 1-7               | 100 (54.1)   |
|                                | 8-15              | 85 (45.9)    |
| Exclusive breastfeeding        | Yes               | 36 (19.5)    |
|                                | No                | 149 (80.5)   |
| Complementary feeding practice | Poor              | 165 (89.2)   |
|                                | Good              | 20 (10.8)    |

321



322 **Table 2: Determinants of wasting**

| Independent variables          | Mean (SD)   | t-test / Bivariate analysis <sup>[a]</sup> |                          | Multivariate analysis <sup>[b]</sup> |                           |         |
|--------------------------------|-------------|--------------------------------------------|--------------------------|--------------------------------------|---------------------------|---------|
|                                |             | Mean difference (95% CI)                   | p                        | β (95% CI)                           | p                         |         |
| Gender                         | Male        | -3.89 (1.41)                               | 0.03<br>(-0.37 to 0.43)  | 0.88                                 | -0.02<br>(-0.47 to 0.33)  | 0.73    |
|                                | Female      | -3.92 (1.32)                               | Reference                |                                      | Reference                 |         |
| Age in months                  | ≤12         | -3.85 (1.43)                               | Reference                | 0.29                                 | Reference                 | 0.12    |
|                                | 13-24       | -4.17 (1.07)                               | -0.32<br>(-0.89 to 0.25) |                                      | -0.12<br>(-0.89 to 0.11)  |         |
|                                | ≥25         | -3.71 (1.46)                               | 0.14<br>(-0.54 to 0.81)  |                                      | 0.008<br>(-0.55 to 0.62)  |         |
| Monthly earning (PKR)          | <15000      | -4.04 (1.36)                               | Reference                | 0.04*                                | Reference                 | 0.03*   |
|                                | 15000-35000 | -3.61 (1.32)                               | 0.43<br>(0.01 to 0.85)   |                                      | -0.14<br>(-0.89 to 0.04)  |         |
| Under five siblings            | ≤2          | -3.98 (1.39)                               | Reference                | 0.14                                 | Reference                 | 0.12    |
|                                | ≥3          | -3.64 (1.25)                               | 0.35<br>(-0.12 to 0.82)  |                                      | -0.11<br>(-0.85 to 0.10)  |         |
| History of Parasites           | Yes         | -3.88 (1.47)                               | 0.03<br>(-0.44 to 0.50)  | 0.89                                 | -0.03<br>(-0.59 to 0.35)  | 0.61    |
|                                | No          | -3.91 (1.33)                               | Reference                |                                      | Reference                 |         |
| TB contact history             | Yes         | -4.09 (1.34)                               | -0.31<br>(-0.71 to 0.08) | 0.09*                                | 0.14<br>(-0.01 to 0.77)   | 0.05*   |
|                                | No          | -3.77 (1.36)                               | Reference                |                                      | Reference                 |         |
| Measles history                | Yes         | -4.07 (1.12)                               | 0.19<br>(-0.74 to 0.36)  | 0.50                                 | 0.06<br>(-0.33 to 0.79)   | 0.42    |
|                                | No          | -3.88 (1.40)                               | Reference                |                                      | Reference                 |         |
| Immunization status            | Done        | -3.84 (1.31)                               | Reference                | 0.23                                 | Reference                 | 0.32    |
|                                | Incomplete  | -4.12 (1.49)                               | -0.28<br>(-0.74 to 0.18) |                                      | 0.07<br>(-0.23 to 0.70)   |         |
| Episodes of illness            | 1-7         | -3.85 (1.27)                               | Reference                | 0.58                                 | Reference                 | 0.13    |
|                                | 8-15        | -3.97 (1.46)                               | 0.12<br>(-0.52 to 0.27)  |                                      | 0.11<br>(-0.09 to 0.71)   |         |
| Complementary feeding practice | Poor        | -4.03 (1.34)                               | Reference                | 0.03*                                | Reference                 | <0.001* |
|                                | Good        | -3.53 (1.39)                               | 0.51<br>(0.05 to 0.96)   |                                      | -0.21<br>(-1.14 to -0.19) |         |
| Exclusive breastfeeding        | Yes         | -3.82 (1.32)                               | 0.10<br>(-0.39 to 0.60)  | 0.67                                 | -0.01<br>(-0.56 to 0.47)  | 0.87    |
|                                | No          | -3.92 (1.37)                               | Reference                |                                      | Reference                 |         |

323 <sup>[a]</sup> Independent t-test for bivariate analysis

324 <sup>[b]</sup> Multivariate analysis

325 \* p-value <0.05

326 **Table 3: Determinants of stunting**

| Independent variables           | Mean (SD)            | t-Test / Bivariate analysis <sup>[a]</sup> |                          | Multivariate analysis <sup>[b]</sup> |                          |                         |
|---------------------------------|----------------------|--------------------------------------------|--------------------------|--------------------------------------|--------------------------|-------------------------|
|                                 |                      | Mean difference (95% CI)                   | p                        | β (95% CI)                           | p                        |                         |
| Gender                          | Male                 | -3.93 (1.66)                               | -0.20<br>(-0.66 to 0.27) | 0.40                                 | 0.08<br>(-0.20 to 0.74)  | 0.27                    |
|                                 | Female               | -3.73 (1.50)                               | Reference                |                                      | Reference                |                         |
| Age in months                   | ≤12                  | -3.86 (1.55)                               | Reference                | 0.80                                 | Reference                | 0.76                    |
|                                 | 13-24                | -3.84 (1.61)                               | 0.02<br>(-0.64 to 0.68)  |                                      | -0.02<br>(-0.68 to 0.50) |                         |
|                                 | ≥25                  | -3.64 (1.63)                               | 0.22<br>(-0.57 to 1.01)  |                                      | 0.03<br>(-0.52 to 0.86)  |                         |
| Monthly earning (PKR)           | <15,000              | -3.77 (1.26)                               | Reference                | 0.54                                 | Reference                | 0.20                    |
|                                 | 15,000-35,000        | -3.92 (1.61)                               | -0.15<br>(-0.65 to 0.34) |                                      | 0.09<br>(-0.18 to 0.84)  |                         |
|                                 | ≥2                   | -3.80 (1.55)                               | Reference                |                                      | Reference                |                         |
| Under five siblings             | ≥3                   | -3.89 (1.66)                               | -0.09<br>(-0.64 to 0.46) | 0.74                                 | 0.003<br>(-0.55 to 0.58) | 0.96                    |
|                                 | Yes                  | -3.59 (1.50)                               | 0.41<br>(-0.53 to 0.86)  |                                      | 0.04*                    |                         |
| TB contact history              | No                   | -3.99 (1.61)                               | Reference                | Reference                            |                          |                         |
|                                 | History of parasites | Yes                                        | -3.93 (1.66)             | -0.14<br>(-0.69 to 0.40)             | 0.61                     | 0.04<br>(-0.37 to 0.74) |
| No                              |                      | -3.78 (1.55)                               | Reference                | Reference                            |                          |                         |
| History of measles              | Yes                  | -4.08 (1.40)                               | -0.30<br>(-0.94 to 0.32) | 0.34                                 | 0.04<br>(-0.44 to 0.88)  | 0.52                    |
|                                 | No                   | -3.77 (1.60)                               | Reference                |                                      | Reference                |                         |
| Complementary feeding practices | Good                 | -3.80 (1.65)                               | 0.02<br>(-0.51 to 0.55)  | 0.93                                 | 0.03<br>(-0.42 to 0.68)  | 0.63                    |
|                                 | Poor                 | -3.82 (1.55)                               | Reference                |                                      | Reference                |                         |
| Exclusive breastfeeding         | Yes                  | -3.22 (1.69)                               | 0.75<br>(0.18 to 1.31)   | 0.01*                                | -0.19<br>(-1.40 to 0.16) | 0.01*                   |
|                                 | No                   | -3.96 (1.51)                               | Reference                |                                      | Reference                |                         |
| Episodes of illness             | 1-7                  | -3.86 (1.64)                               | Reference                | 0.68                                 | Reference                | 0.50                    |
|                                 | 8-15                 | -3.77 (1.49)                               | 0.09<br>(-0.36 to 0.55)  |                                      | -0.05<br>(-0.63 to 0.31) |                         |
| Immunization status             | Done                 | -3.83 (1.52)                               | Reference                | 0.83                                 | Reference                | 0.96                    |
|                                 | Incomplete           | -3.77 (1.74)                               | 0.05<br>(-0.47 to 0.58)  |                                      | 0.01<br>(-0.53 to 0.56)  |                         |

327 <sup>[a]</sup> Independent t-test for bivariate analysis

328 <sup>[b]</sup> Multivariate analysis

329 \* p-value <0.05

330 **Table 4: Determinants of undernutrition**

| Independent variables           | Mean (SD)     | t-Test / Bivariate analysis <sup>[a]</sup> |                          | Multivariate analysis <sup>[b]</sup> |                          |       |
|---------------------------------|---------------|--------------------------------------------|--------------------------|--------------------------------------|--------------------------|-------|
|                                 |               | Mean difference (95% CI)                   | p                        | β (95% CI)                           | p                        |       |
| Gender                          | Male          | -4.83 (0.89)                               | 0.01<br>(-0.27 to 0.28)  | 0.97                                 | -0.05<br>(-0.45 to 0.20) | 0.46  |
|                                 | Female        | -4.83 (0.99)                               | Reference                |                                      | Reference                |       |
| Age in months                   | ≤12           | -4.58 (1.12)                               | Reference                | 0.47                                 | Reference                | 0.54  |
|                                 | 13-24         | -4.64 (0.98)                               | -0.05<br>(-0.50 to 0.39) |                                      | -0.05<br>(-0.54 to 0.28) |       |
|                                 | ≥25           | -4.31 (1.05)                               | 0.27<br>(-0.27 to 0.81)  |                                      | 0.07<br>(-0.25 to 0.71)  |       |
| Monthly earnings (PKR)          | <15,000       | -4.93 (0.90)                               | Reference                | 0.03*                                | Reference                | 0.02* |
|                                 | 15,000-35,000 | -4.61 (1.00)                               | 0.32<br>(0.03 to 0.61)   |                                      | 0.28<br>(-0.11 to 0.62)  |       |
| Under five siblings             | ≤2            | -4.85 (0.93)                               | Reference                | 0.25                                 | Reference                | 0.18  |
|                                 | ≥3            | -4.79 (0.98)                               | 0.06<br>(-0.16 to 0.59)  |                                      | -0.11<br>(-0.70 to 0.08) |       |
| TB contact history              | Yes           | -4.82 (0.97)                               | 0.02<br>(-0.25 to 0.30)  | 0.86                                 | 0.008<br>(-0.29 to 0.35) | 0.92  |
|                                 | No            | -4.85 (0.93)                               | Reference                |                                      | Reference                |       |
| History of parasites            | Yes           | -4.93 (0.94)                               | -0.12<br>(-0.45 to 0.20) | 0.46                                 | 0.06<br>(-0.15 to 0.54)  | 0.27  |
|                                 | No            | -4.8 (0.94)                                | Reference                |                                      | Reference                |       |
| History of measles              | Yes           | -4.75 (0.94)                               | 0.10<br>(-0.28 to 0.48)  | 0.61                                 | -0.03<br>(-0.58 to 0.26) | 0.48  |
|                                 | No            | -4.85 (0.95)                               | Reference                |                                      | Reference                |       |
| Exclusive breastfeeding         | Yes           | -4.52 (0.85)                               | 0.39<br>(0.05 to 0.73)   | 0.03*                                | 0.22<br>(0.17 to 0.39)   | 0.02* |
|                                 | No            | -4.91 (0.95)                               | Reference                |                                      | Reference                |       |
| Complementary feeding practices | Poor          | -4.89 (0.94)                               | Reference                | 0.19                                 | Reference                | 0.08  |
|                                 | Good          | -4.68 (0.95)                               | 0.21<br>(-0.10 to 0.53)  |                                      | 0.09<br>(-0.91 to 0.012) |       |
| Episodes of illness             | 1-7           | -4.88 (0.87)                               | Reference                | 0.57                                 | Reference                | 0.26  |
|                                 | 8-15          | -4.79 (1.0)                                | -0.08<br>(-0.35 to 0.19) |                                      | 0.17<br>(-0.08 to 0.42)  |       |
| Immunization                    | Done          | -4.87 (0.92)                               | Reference                | 0.33                                 | Reference                | 0.84  |
|                                 | Incomplete    | -4.72 (1.02)                               | 0.16<br>(-0.16 to 0.47)  |                                      | 0.01<br>(-0.45 to 0.28)  |       |

331 <sup>[a]</sup> Independent t-test for bivariate analysis

332 <sup>[b]</sup> Multivariate analysis

333 \* p-value <0.05

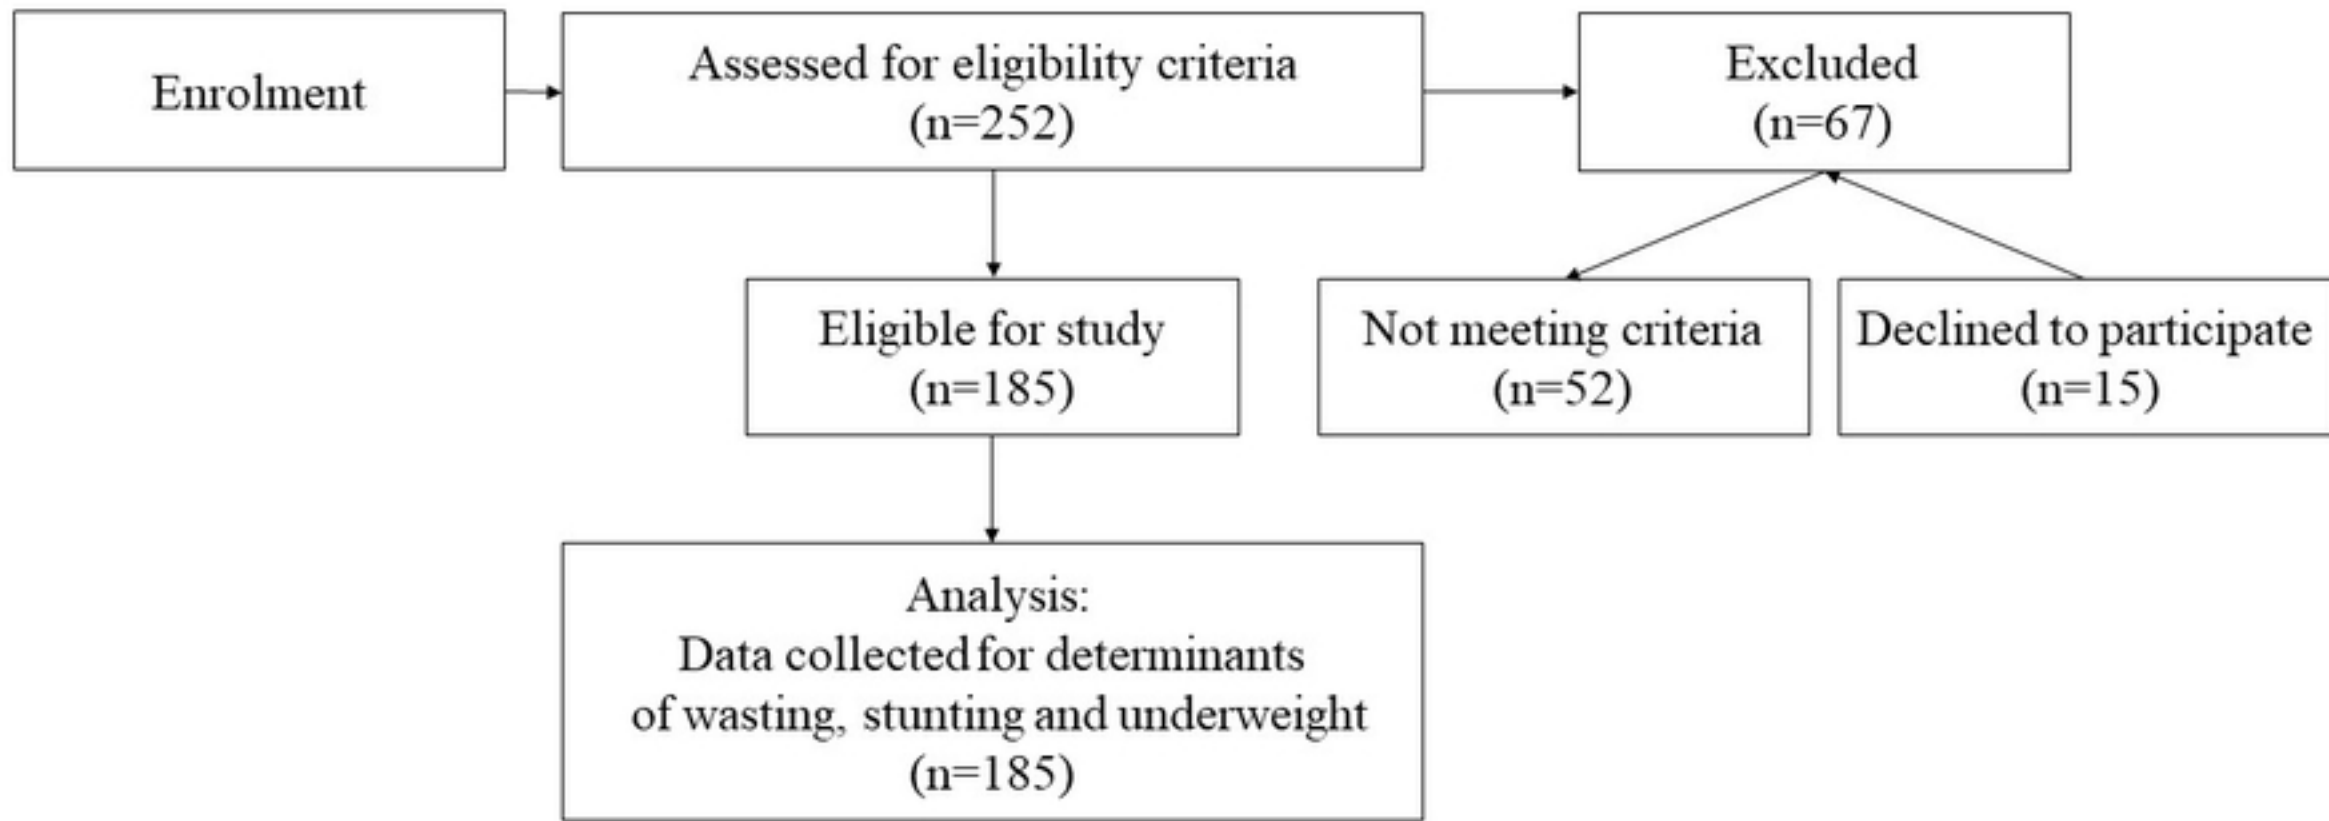

Figure 1
